# Supplementary material for: Multilayered Networks of SalmoNet2 Enable Strain Comparisons of the Salmonella Genus on a Molecular Level
Source: PubMed Central journal article supplement (PMC9426430; doi:10.1128/msystems.01493-21), 2022-08-01
Supplement: msystems.01493-21-s0002.pdf [file msystems.01493-21-s0002.pdf]

| Strain                                                                                    | Five letter code | Orthologous protein overlap with <i>E. coli</i> | Percentage match |
|-------------------------------------------------------------------------------------------|------------------|-------------------------------------------------|------------------|
| <i>Salmonella enterica</i> subsp. <i>Enterica</i> serovar <i>Agona</i> str. SL483         | SALA4            | 3016                                            | 72.8%            |
| <i>Salmonella enterica</i> subsp. <i>Arizonae</i> serovar 62:z4,z23:-                     | SALAR            | 2859                                            | 69.1%            |
| <i>Salmonella bongori</i> NCTC 12419                                                      | SALBC            | 2961                                            | 71.5%            |
| <i>Salmonella enterica</i> subsp. <i>Enterica</i> serovar <i>Choleraesuis</i> str. SC-B67 | SALCH            | 2987                                            | 72.1%            |
| <i>Salmonella enterica</i> subsp. <i>Enterica</i> serovar <i>Dublin</i> str. CT 02021853  | SALDC            | 2983                                            | 72.1%            |
| <i>Salmonella enterica</i> subsp. <i>Enterica</i> serovar <i>Enteritidis</i> str. P125109 | SALEP            | 3092                                            | 74.7%            |
| <i>Salmonella enterica</i> subsp. <i>Enterica</i> serovar <i>Gallinarum</i> str. 287/91   | SALG2            | 3075                                            | 74.3%            |
| <i>Salmonella enterica</i> subsp. <i>Enterica</i> serovar <i>Heidelberg</i> str. SL476    | SALHS            | 3044                                            | 73.5%            |

|                                                                                                               |       |      |       |
|---------------------------------------------------------------------------------------------------------------|-------|------|-------|
| <i>Salmonella enterica</i> subsp.<br><i>Enterica</i> serovar <i>Newport</i> str.<br><i>SL254</i>              | SALNS | 3033 | 73.3% |
| <i>Salmonella enterica</i> subsp.<br><i>Enterica</i> serovar <i>Paratyphi A</i><br>str. <i>AKU 12601</i>      | SALPK | 3006 | 72.6% |
| <i>Salmonella enterica</i> subsp.<br><i>Enterica</i> serovar <i>Paratyphi A</i><br>str. <i>ATCC 9150</i>      | SALPA | 2960 | 71.5% |
| <i>Salmonella enterica</i> subsp.<br><i>Enterica</i> serovar <i>Paratyphi B</i><br>str. <i>SPB7</i>           | SALPB | 3077 | 74.3% |
| <i>Salmonella enterica</i> subsp.<br><i>Enterica</i> serovar <i>Paratyphi C</i><br>str. <i>RKS4594</i>        | SALPC | 2996 | 72.3% |
| <i>Salmonella enterica</i> subsp.<br><i>Enterica</i> serovar<br><i>Schwarzengrund</i> str.<br><i>CVM19633</i> | SALSV | 2993 | 72.3% |
| <i>Salmonella enterica</i> subsp.<br><i>Enterica</i> serovar <i>Typhimurium</i><br>str. <i>14028S</i>         | SALT1 | 3109 | 75.1% |
| <i>Salmonella enterica</i> subsp.<br><i>Enterica</i> serovar <i>Typhimurium</i><br>str. <i>LT2</i>            | SALTY | 3103 | 74.9% |

|                                                                                                       |       |      |       |
|-------------------------------------------------------------------------------------------------------|-------|------|-------|
| <i>Salmonella enterica</i> subsp.<br><i>Enterica</i> serovar <i>Typhimurium</i><br>str. <i>ST4/74</i> | SALT4 | 3110 | 75.1% |
| <i>Salmonella enterica</i> subsp.<br><i>Enterica</i> serovar <i>Typhimurium</i><br>str. <i>SL1344</i> | SALTS | 3107 | 75%   |
| <i>Salmonella enterica</i> subsp.<br><i>Enterica</i> serovar <i>Typhimurium</i><br>str. <i>D23580</i> | SALTD | 3095 | 74.8% |
| <i>Salmonella enterica</i> subsp.<br><i>Enterica</i> serovar <i>Typhi</i> str.<br><i>CT18</i>         | SALTI | 3013 | 72.8% |
