# Supplementary material for: Multilayered Networks of SalmoNet2 Enable Strain Comparisons of the Salmonella Genus on a Molecular Level
Source: PubMed Central journal article supplement (PMC9426430; doi:10.1128/msystems.01493-21), 2022-08-01

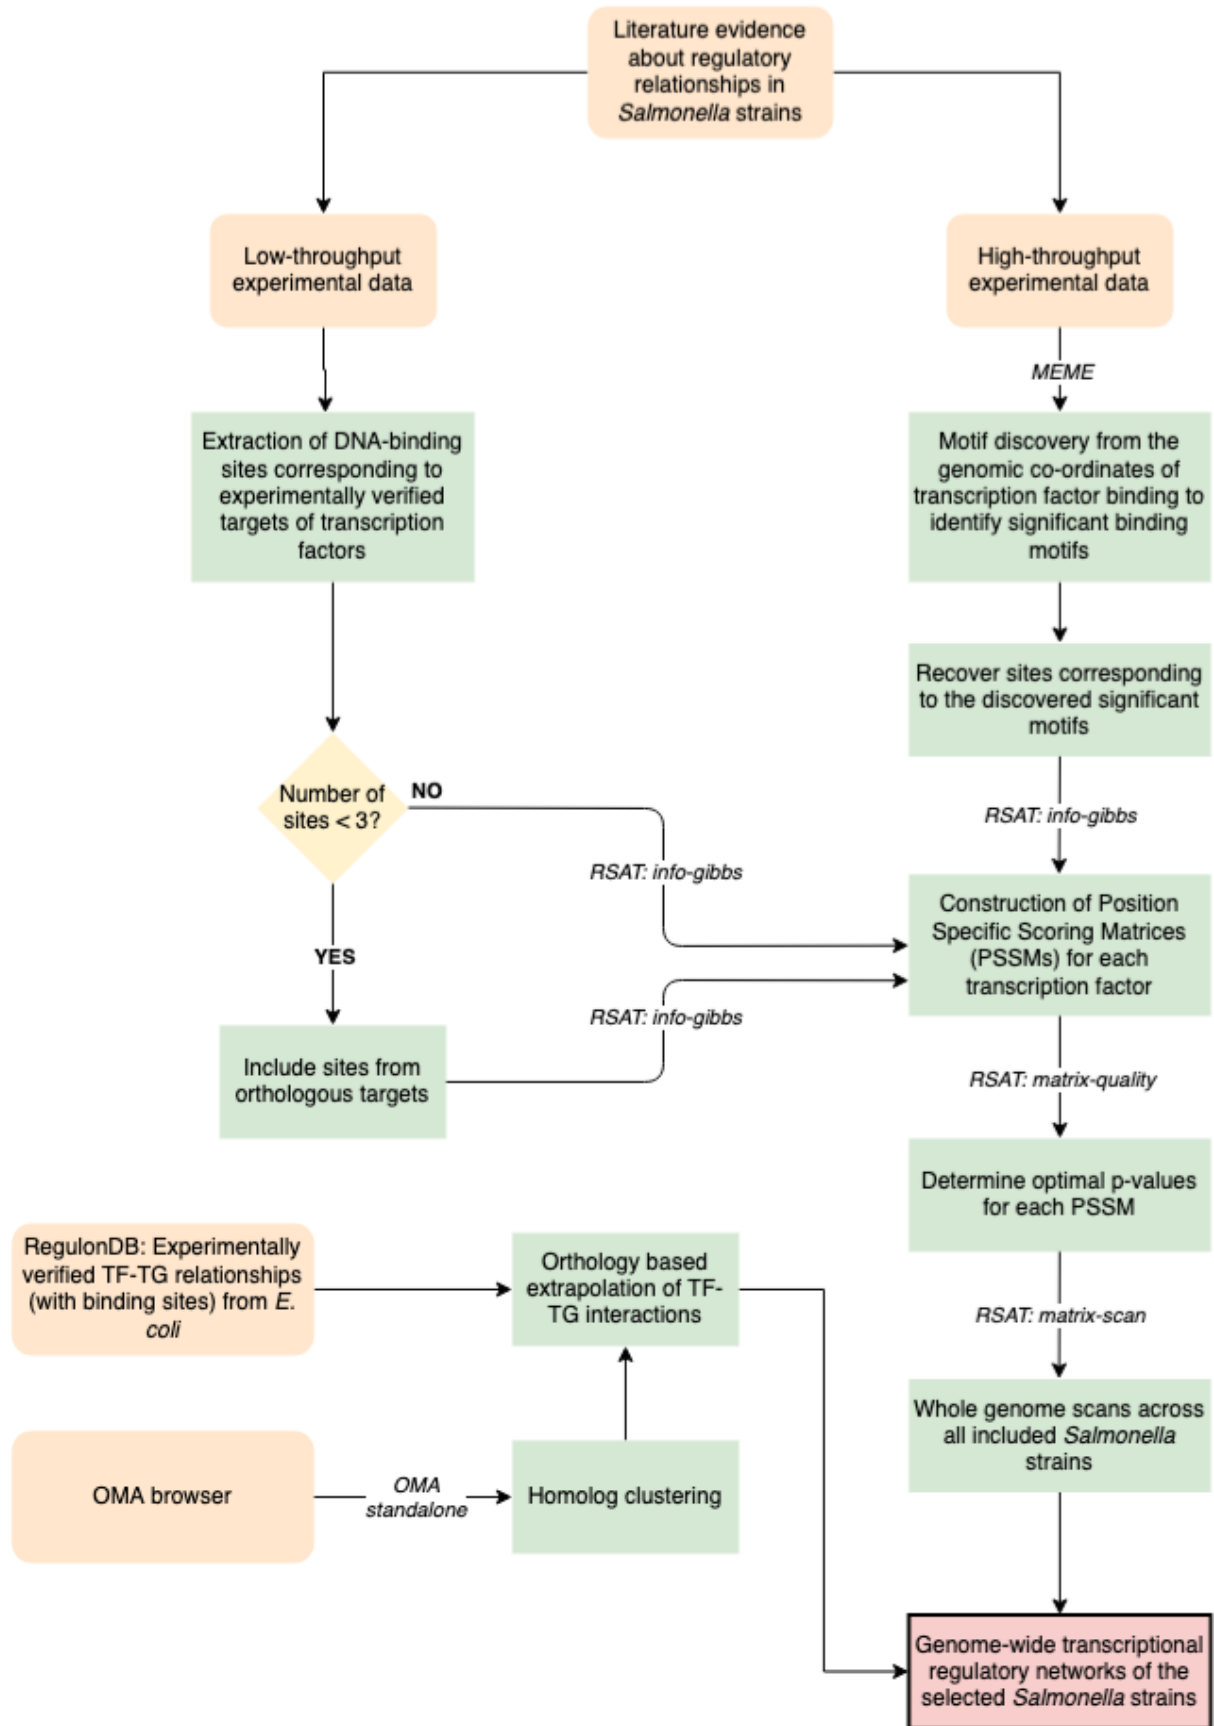

Supplement: msystems.01493-21-s0003.pdf [file msystems.01493-21-s0003.pdf]
